# Supplementary material for: Developing a far-red fluorogenic beta-galactosidase probe for senescent cell imaging and photoablation
Source: Royal Society of Chemistry journal article supplement (doi:10.1039/d2ra00377e), 2022-01-01
Supplement: d2ra00377e1.pdf [file d2ra00377e1.pdf]

## **Electronic Supplementary Information**

### **Developing a far-red fluorogenic beta-galactosidase probe for senescent cell imaging and photoablation**

Seung Koo Lee,# Zhenhua Shen,# Myung Shin Han and Ching-Hsuan Tung\*

Molecular Imaging Innovations Institute, Department of Radiology, Weill Cornell Medicine,  
New York, NY, USA.

# Equal contribution

\* To whom correspondence should be addressed.

413 East 69<sup>th</sup> Street, Box 290, New York, NY 10021, USA. Phone: +1-646-962-2923; E-  
mail: [cht2018@med.cornell.edu](mailto:cht2018@med.cornell.edu).

**Figure S1.** Synthetic scheme of Gal-MB.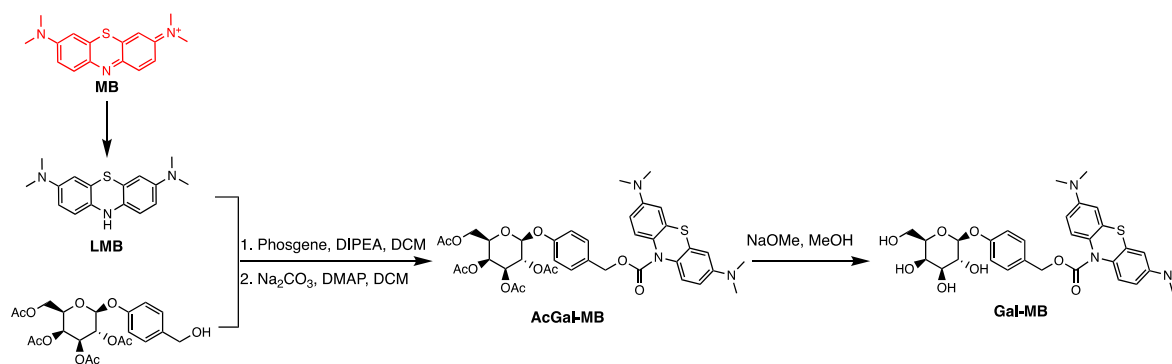

**Fig. S2.** Characterization of Gal-MB and MB. (A) Absorption and emission spectra. (B) LC-MS spectra of Gal-MB activation by  $\beta$ -gal. Gal-MB (300  $\mu$ M, 1 mL) in PBS buffer (pH = 7.4) was treated with  $\beta$ -gal (10 U L<sup>-1</sup>) at room temperature. The HPLC spectra (*left*) were recorded at different time points (0, 5, 15, and 60 min). MS spectra (*right*) confirmed that the peak at 5.90 min was Gal-MB ( $m/z = 598.5$ ) and the peak at 5.77 min was MB ( $m/z = 284.2$ ).

A.

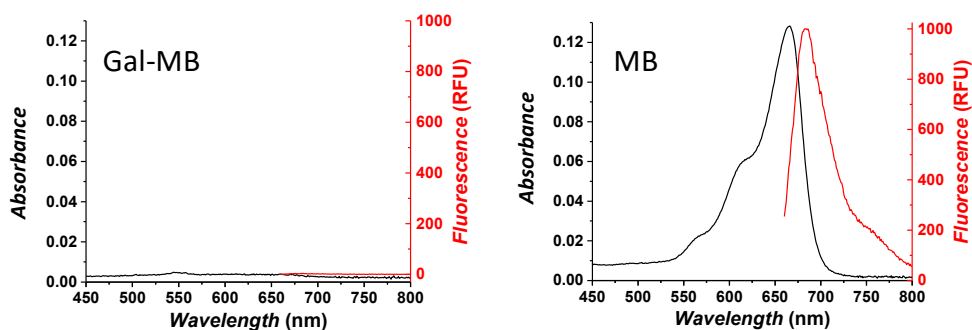

B.

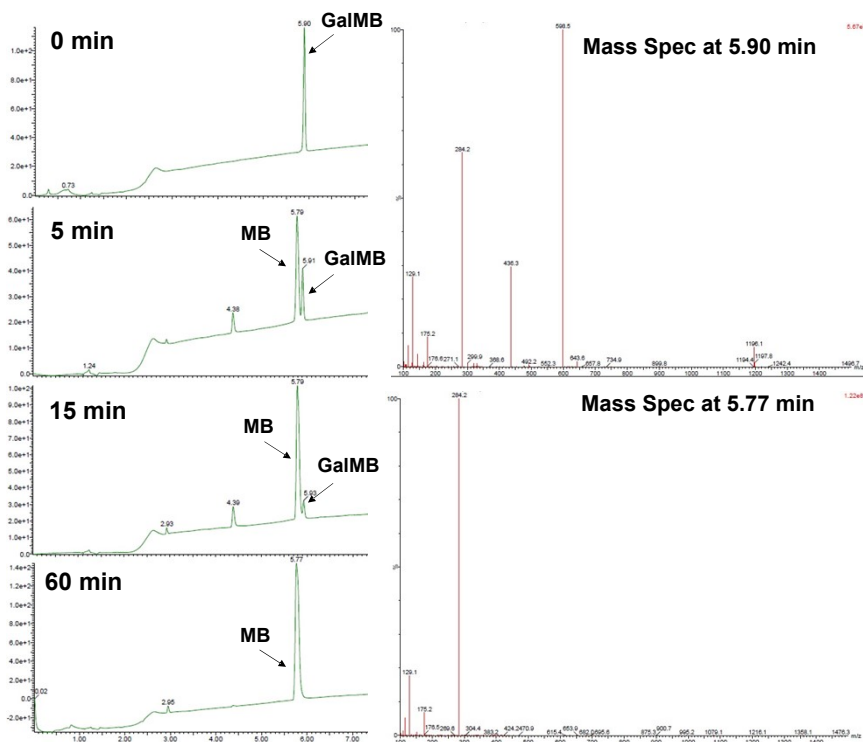

**Figure S3.** SA- $\beta$ -gal dependent Gal-MB activation. A549 cells were irradiated with various dose of X-ray (0, 2, 5, or 10 Gy) and incubated in complete medium for 5 days. (A) X-ray-induced senescent cells were investigated by X-gal staining (magnification:  $\times 20$ ). (B) For SA- $\beta$ -gal detection, the irradiated A549 cells (0, 2, 5, or 10 Gy) were incubated with Gal-MB (5  $\mu$ M) for 1 h, washed and imaged using fluorescence microscope (magnification:  $\times 40$ ). Scale bar, 100  $\mu$ m. (C) The Gal-MB fluorescence intensity was quantified using ImageJ.

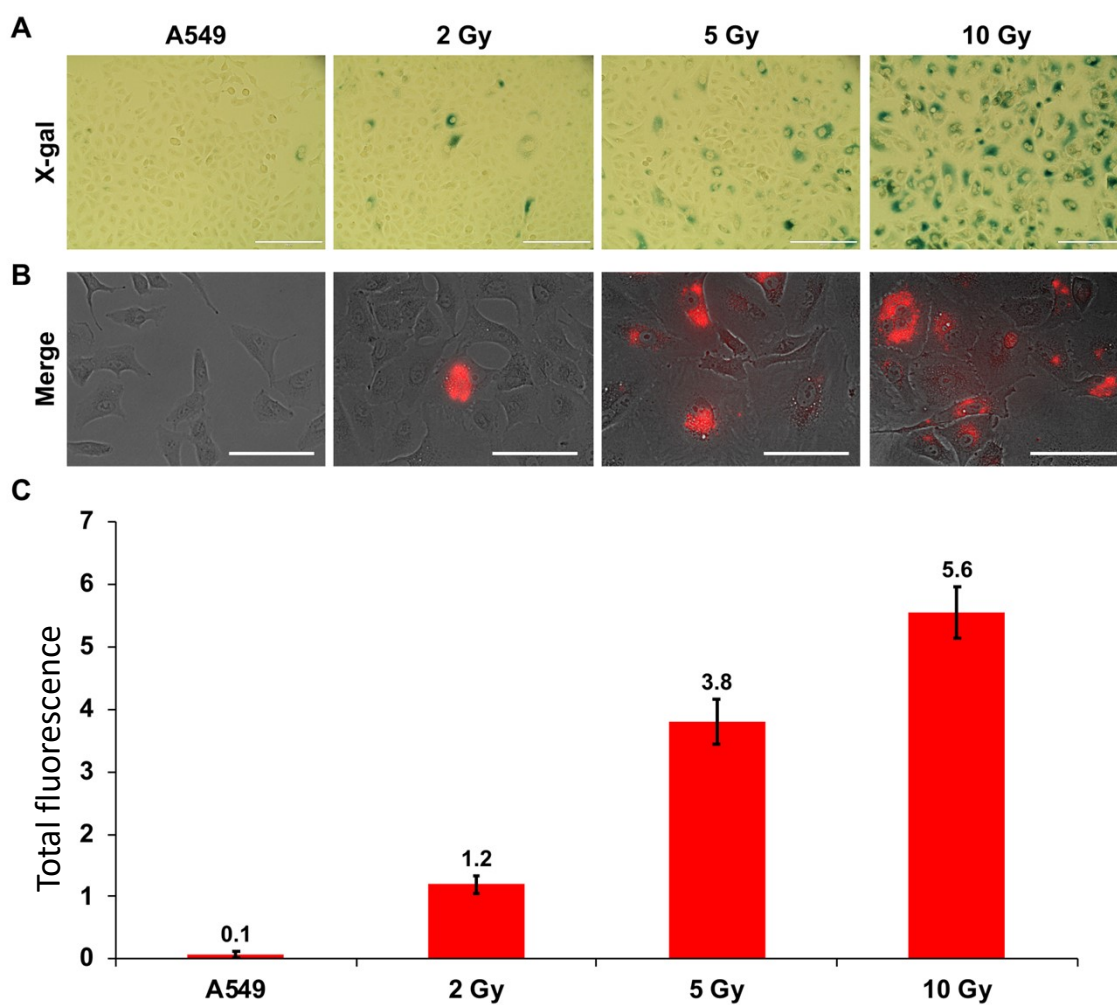

**Figure S4.** Gal-MB's photoablation effect in control MDA-MB231 cells. MDA-MB231 cells were incubated without or with Gal-MB (15  $\mu$ M for 2 h), washed, and illuminated without or with 665 nm LED light (30 mW  $\text{cm}^{-2}$ ) for 30 min. Cells were imaged with fluorescence microscope after 1 day (magnification:  $\times 40$ ). Scale bar, 100  $\mu$ m.

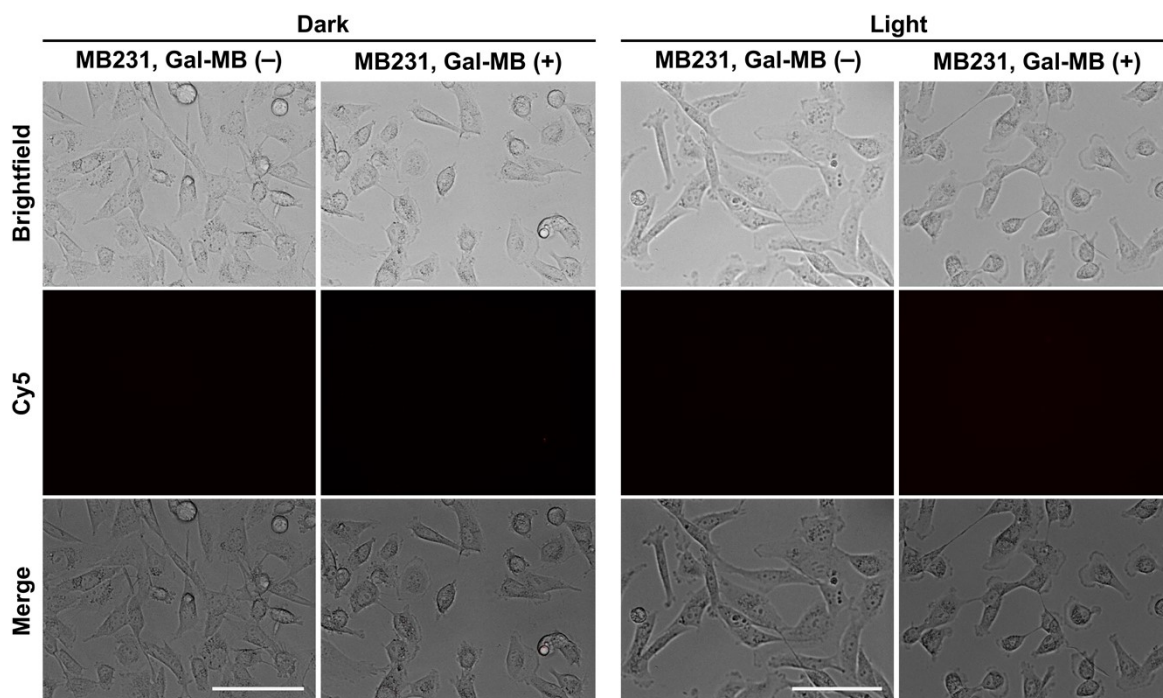

**Figure S5.** Light-induced redistribution of Gal-MB from lysosome to nucleus in *C6/LacZ* cells. Cells were treated with Gal-MB (20  $\mu$ M) for 2 h, washed and captured before and after light illumination (magnification:  $\times 40$ ). Hoechst 33342 was added for nuclei staining.

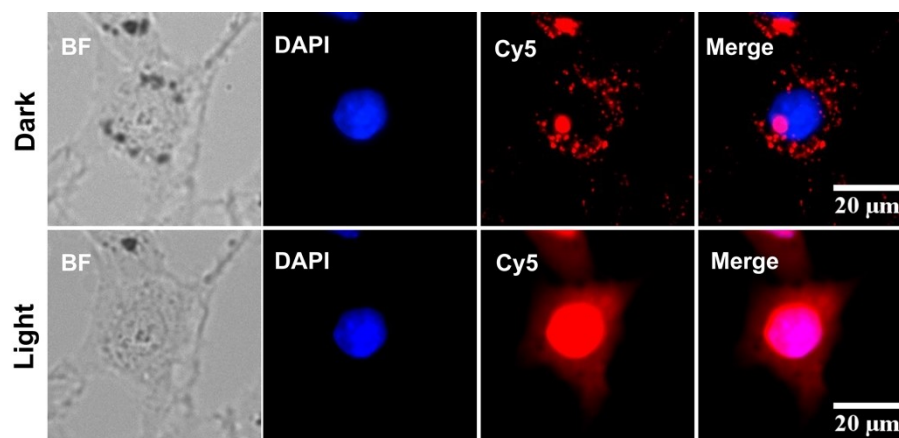

**<sup>1</sup>H NMR of Gal-MB**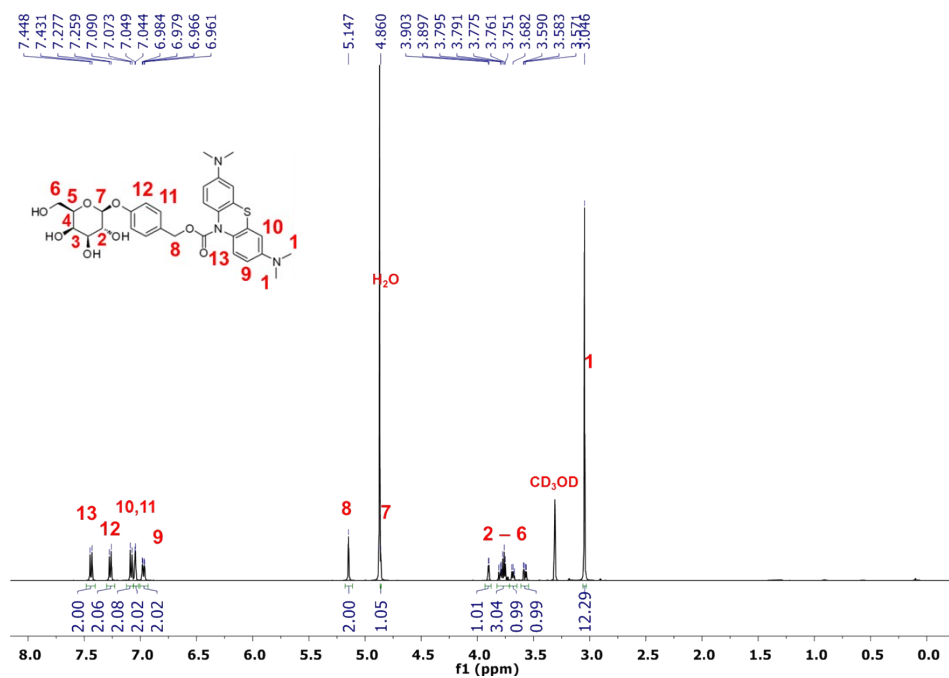**<sup>13</sup>C NMR of Gal-MB**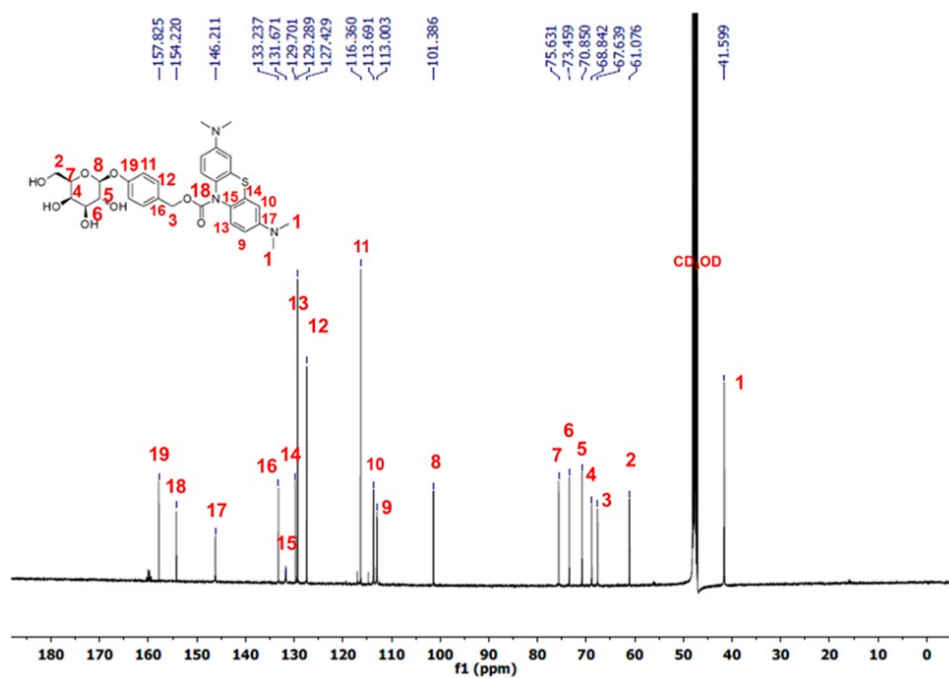

## HRMS Spectrum of AcGal-MB

### Elemental Composition Report

Page 1

#### Single Mass Analysis

Tolerance = 5.0 PPM / DBE: min = -1.5, max = 50.0

Element prediction: Off

Number of isotope peaks used for i-FIT = 2

Monoisotopic Mass, Even Electron Ions

168 formula(e) evaluated with 1 results within limits (up to 50 closest results for each mass)

Elements Used:

C: 0-38 H: 0-44 N: 1-5 O: 1-12 S: 0-2

Ching Tung (Cornell)

Zhenhua Chen

C38H43N3O12S

ZS\_AcGalMB 32 (0.714) Cm (31:35)

NMR Analytical Core Facility  
LCT Premier XE

11-Aug-2020

1::5:0

1: TOF MS ES+  
1.61e+005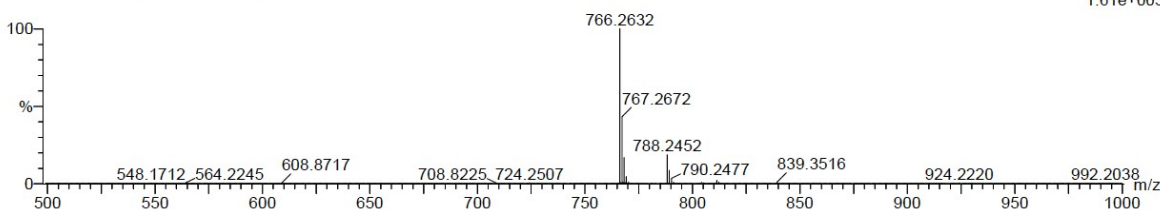

Minimum: -1.5  
Maximum: 50.0

| Mass | Calc. Mass | mDa | PPM | DBE | i-FIT | i-FIT (Norm) | Formula |
|------|------------|-----|-----|-----|-------|--------------|---------|
|------|------------|-----|-----|-----|-------|--------------|---------|

## HRMS Spectrum of Gal-MB

### Elemental Composition Report

Page 1

#### Single Mass Analysis

Tolerance = 5.0 PPM / DBE: min = -1.5, max = 50.0

Element prediction: Off

Number of isotope peaks used for i-FIT = 2

Monoisotopic Mass, Even Electron Ions

64 formula(e) evaluated with 1 results within limits (up to 50 closest results for each mass)

Elements Used:

C: 0-30 H: 0-36 N: 1-3 O: 1-8 S: 0-2

Ching Tung (Cornell)

Zhenhua Chen

C30H35N3O8S

ZS\_GalMB 18 (0.407) Cm (17:22)

NMR Analytical Core Facility  
LCT Premier XE

11-Aug-2020

1::0:7

1: TOF MS ES+  
7.63e+004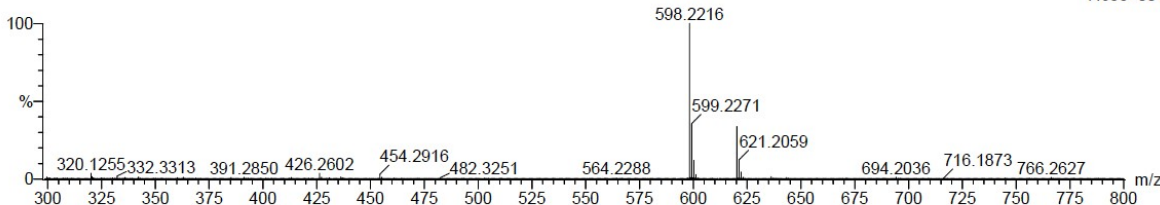

Minimum: -1.5  
Maximum: 50.0

| Mass | Calc. Mass | mDa | PPM | DBE | i-FIT | i-FIT (Norm) | Formula |
|------|------------|-----|-----|-----|-------|--------------|---------|
|------|------------|-----|-----|-----|-------|--------------|---------|
