# Supplementary figures and images for: Developing a far-red fluorogenic beta-galactosidase probe for senescent cell imaging and photoablation
Source: Royal Society of Chemistry journal article supplement (doi:10.1039/d2ra00377e), 2022-01-01

Raw western blot images.

The date reported in this manuscript are highlighted by blue boxes.

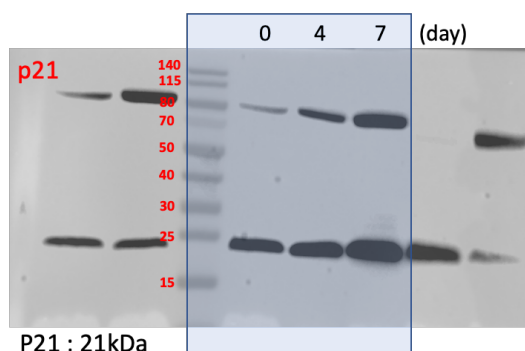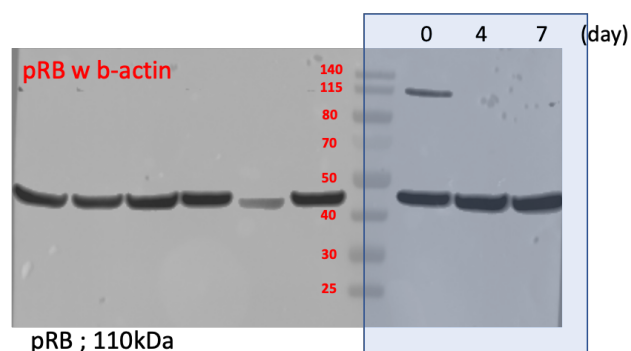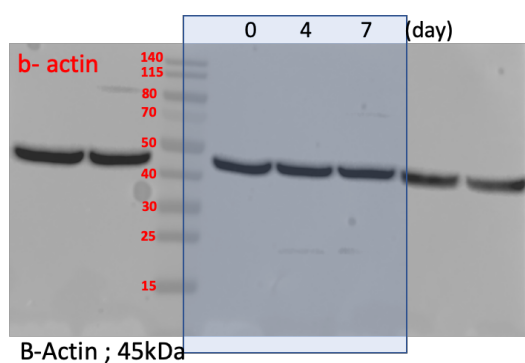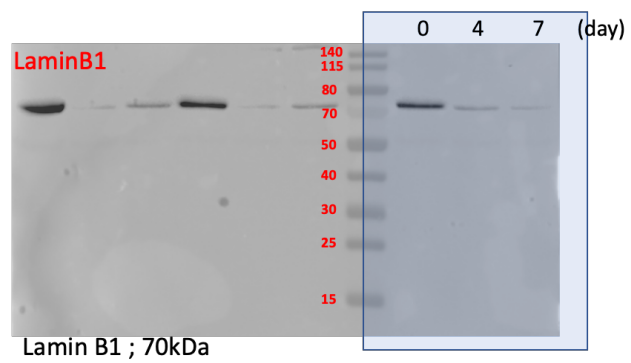

Supplement: d2ra00377e2.pdf [file d2ra00377e2.pdf]
